# Supplementary material
Source: ML conference proceedings conference paper supplement (https://proceedings.neurips.cc/paper_files/paper/2007/hash/72da7fd6d1302c0a159f6436d01e9eb0-Abstract.html)
Supplement: Supplementary file [file 72da7fd6d1302c0a159f6436d01e9eb0-Supplemental.zip]

## Estimating divergence functionals and the likelihood ratio by penalized convex risk minimization

- given  $n$  resp.  $m$  i.i.d. samples:
$$\begin{array}{ll} X_1, \dots, X_n & \sim \mathbb{P} \text{ (unknown)} \\ Y_1, \dots, Y_m & \sim \mathbb{Q} \text{ (unknown)} \end{array}$$
- propose, analyze and evaluate convergence behavior of a nonparametric estimator for divergence functional  $D_\phi(\mathbb{P}, \mathbb{Q})$  based on  $(X, Y)$ :

$$D_\phi(\mathbb{P}, \mathbb{Q}) \quad := \quad \int \phi \left( \frac{d\mathbb{Q}}{d\mathbb{P}} \right) d\mathbb{P} = \int \phi \left( \frac{q_0}{p_0} \right) p_0 d\mu.$$

- also estimator of likelihood ratio function  $\frac{d\mathbb{P}}{d\mathbb{Q}}$
- **applications:** estimating mutual information and KL divergence in coding, independent component analysis, dimensionality reduction, experiment design,...
- idea: based on **variational characterization** of divergence functionals
